# Supplementary material for: Traffic Crashes, Violations, and Suspensions Among Young Drivers With ADHD
Source: Oxford University Press journal article supplement (doi:10.1542/peds.2018-2305), 2019-05-20
Supplement: peds_20182305supplementarydata.pdf [file peds_20182305supplementarydata.pdf]

# Supplemental Information

**SUPPLEMENTAL TABLE 3** Average Monthly Rates (per 10 000 Driver-Months) and adjRRs for Crashes, Traffic Violations, and License Suspensions; Comparing Drivers With and Without ADHD

|                                 | 12 Months Post-Licensure |       |                |       |                           |                               | 48 Months Post-Licensure |       |                |       |                           |                               |  |
|---------------------------------|--------------------------|-------|----------------|-------|---------------------------|-------------------------------|--------------------------|-------|----------------|-------|---------------------------|-------------------------------|--|
|                                 | ADHD                     |       | No ADHD        |       | cRR (95% CI) <sup>a</sup> | adjRR (95% CI) <sup>b</sup>   | ADHD                     |       | No ADHD        |       | cRR (95% CI) <sup>a</sup> | adjRR (95% CI) <sup>b</sup>   |  |
|                                 | N <sup>c</sup>           | Rate  | N <sup>c</sup> | Rate  |                           |                               | N <sup>c</sup>           | Rate  | N <sup>c</sup> | Rate  |                           |                               |  |
| <b>Crashes</b>                  |                          |       |                |       |                           |                               |                          |       |                |       |                           |                               |  |
| All crashes                     | 389                      | 194.3 | 2238           | 148.2 | 1.31 (1.17–1.46)          | 1.27 (1.12–1.43)              | 940                      | 147.6 | 5128           | 102.0 | 1.45 (1.34–1.56)          | 1.37 (1.26–1.48)              |  |
| At fault                        | 312                      | 155.8 | 1614           | 106.9 | 1.46 (1.29–1.65)          | 1.40 (1.23–1.60)              | 698                      | 109.6 | 3418           | 68.0  | 1.61 (1.48–1.76)          | 1.49 (1.36–1.63)              |  |
| Peer passenger                  | 134                      | 66.9  | 718            | 47.6  | 1.41 (1.16–1.70)          | 1.45 (1.18–1.79)              | 235                      | 36.9  | 1213           | 24.1  | 1.53 (1.32–1.77)          | 1.52 (1.30–1.78)              |  |
| Single vehicle                  | 66                       | 33.0  | 338            | 22.4  | 1.47 (1.14–1.91)          | 1.21 (0.91–1.59)              | 171                      | 26.8  | 766            | 15.2  | 1.76 (1.49–2.09)          | 1.49 (1.24–1.78)              |  |
| Multiple passenger              | 52                       | 26.0  | 235            | 15.6  | 1.67 (1.23–2.26)          | 1.67 (1.20–2.32)              | 99                       | 15.5  | 470            | 9.3   | 1.66 (1.34–2.07)          | 1.69 (1.33–2.13)              |  |
| Early night                     | 33                       | 16.5  | 179            | 11.9  | 1.39 (0.96–2.01)          | 1.31 (0.89–1.95)              | 63                       | 9.9   | 381            | 7.6   | 1.31 (1.00–1.70)          | 1.26 (0.96–1.66)              |  |
| Injury                          | 29                       | 14.5  | 121            | 8.0   | 1.81 (1.21–2.70)          | 1.71 (1.13–2.59)              | 64                       | 10.0  | 282            | 5.6   | 1.79 (1.37–2.34)          | 1.62 (1.23–2.14)              |  |
| Late night                      | 23                       | 11.5  | 112            | 7.4   | 1.55 (0.99–2.42)          | 1.25 (0.77–2.03)              | 70                       | 11.0  | 333            | 6.6   | 1.66 (1.29–2.14)          | 1.42 (1.08–1.86)              |  |
| Alcohol related                 | 6                        | 3.0   | 11             | 0.7   | 4.11 (1.52–11.1)          | 2.58 (0.86–7.77) <sup>d</sup> | 18                       | 2.8   | 52             | 1.0   | 2.73 (1.57–4.77)          | 2.09 (1.16–3.76) <sup>d</sup> |  |
| <b>Violations</b>               |                          |       |                |       |                           |                               |                          |       |                |       |                           |                               |  |
| All violations                  | 1071                     | 534.9 | 4843           | 320.8 | 1.67 (1.52–1.83)          | 1.36 (1.23–1.50)              | 3279                     | 514.7 | 15 512         | 308.4 | 1.67 (1.56–1.79)          | 1.42 (1.32–1.52)              |  |
| Moving violations               | 643                      | 321.1 | 3043           | 201.6 | 1.59 (1.44–1.77)          | 1.37 (1.23–1.53)              | 1943                     | 305.0 | 9271           | 184.3 | 1.65 (1.54–1.78)          | 1.47 (1.36–1.58)              |  |
| Careless driving                | 273                      | 136.3 | 1371           | 90.8  | 1.50 (1.31–1.72)          | 1.36 (1.17–1.58)              | 778                      | 122.1 | 3484           | 69.3  | 1.76 (1.61–1.93)          | 1.57 (1.43–1.72)              |  |
| Speeding                        | 162                      | 80.9  | 738            | 48.9  | 1.66 (1.38–1.99)          | 1.39 (1.14–1.69)              | 525                      | 82.4  | 2719           | 54.1  | 1.52 (1.37–1.70)          | 1.42 (1.27–1.59)              |  |
| Electronic equipment use        | 21                       | 10.5  | 110            | 7.3   | 1.44 (0.90–2.30)          | 1.31 (0.78–2.21)              | 98                       | 15.4  | 501            | 10.0  | 1.54 (1.25–1.92)          | 1.51 (1.20–1.90)              |  |
| Alcohol and/or drug use         | 23                       | 11.5  | 32             | 2.1   | 5.42 (2.86–10.3)          | 3.57 (1.82–7.02) <sup>d</sup> | 62                       | 9.7   | 218            | 4.3   | 2.25 (1.61–3.13)          | 1.61 (1.13–2.30)              |  |
| Seat belt nonuse                | 126                      | 62.9  | 539            | 35.7  | 1.76 (1.41–2.20)          | 1.25 (0.98–1.61)              | 474                      | 74.4  | 2337           | 46.5  | 1.60 (1.40–1.83)          | 1.25 (1.08–1.44)              |  |
| GDL restrictions <sup>e</sup>   | 77                       | 39.2  | 398            | 26.7  | 1.47 (1.14–1.89)          | 1.06 (0.80–1.40)              | n/a                      | n/a   | n/a            | n/a   | n/a                       | n/a                           |  |
| License suspension <sup>f</sup> | 4557                     | 2.7   | 16 059         | 1.3   | 2.13 (1.41–3.22)          | 1.27 (0.81–1.99) <sup>d</sup> | 74 336                   | 13.5  | 297 763        | 7.0   | 1.94 (1.59–2.35)          | 1.32 (1.08–1.61) <sup>d</sup> |  |

cRR, crude rate ratio; n/a, not applicable.

<sup>a</sup> cRR estimates were obtained by using a generalized estimating equation Poisson regression model, accounting for within-driver correlation only.

<sup>b</sup> adjRR estimates were obtained by using a generalized estimating equation Poisson regression model, accounting for within-driver correlation and controlling for sex, age at licensure, race and/or ethnicity, insurance payer, presence of DSD, presence of seizure disorder, zip code-level indicators for neighborhood income and population density, primary care location, birth year, and calendar month (linear and quadratic terms).

<sup>c</sup> Number of crashes, violations, or suspensions among all drivers during the period specified are included in the numerator of the rates.

<sup>d</sup> The fully adjusted model did not converge; the limited adjusted model included only sex and age at licensure.

<sup>e</sup> The rate of violation of GDL restrictions (eg, nighttime or passenger restrictions) was limited to those licensed before age 21 and was estimated only for the first 12 months after licensure.

<sup>f</sup> Suspension events are number of days; suspension rates are number of days per driver-year.
